# Supplementary material for: A BN analog of two-dimensional triphenylene-graphdiyne: stability and properties
Source: Royal Society of Chemistry journal article supplement (doi:10.1039/c9nr02334h), 2019-01-01
Supplement: c9nr02334h1.pdf [file c9nr02334h1.pdf]

## Supporting Information

### Band Gap Engineering of two-dimensional Triphenylene-Graphdiyne and its BN analog: A first-principles calculation

Imran Muhammad <sup>a</sup>, Huanhuan Xie <sup>a</sup>, Umer Younis <sup>a</sup>, Yu Qie <sup>a</sup>, Waseem Aftab <sup>a</sup>, and Qiang Sun <sup>a,b,\*</sup>

<sup>a</sup>Department of Material Science and Engineering, College of Engineering, Peking University, Beijing 10087, China.

<sup>b</sup>Center for Applied Physics and Technology, Peking University, Beijing 10087, China

#### 1. Atomic structure of Tp-BNyne unit-cell in VASP POSCAR

H6B9N9C12

1.0000000000000000

13.9688768905323091 -0.0000361897967007 -0.0000023256900294  
-6.9844697754505729 12.0974541111990330 0.0000047733704824  
-0.0000024600041050 0.0000044090500615 14.7705627766065941

H B N C  
6 9 9 12

Direct

0.4013494093002178 0.4570952625099690 0.4999999912969950  
0.5429025884495811 0.9442546136776607 0.5000000080695042  
0.0557421046299554 0.5986515055025636 0.5000000143861630  
0.5471774891151187 0.5848307742654246 0.4999999825836667  
0.0376573745676710 0.4528294813757177 0.4999992779217856  
0.4151730079543553 0.9623432047822397 0.5000000231452524  
0.6484792534653986 0.8788197192764877 0.5000004168458486  
0.1211787926150578 0.7696562693428043 0.5000000075231326  
0.2303413667128479 0.3515224284674903 0.5000000234976690  
0.5415914970581773 0.6676579201366848 0.5000000012185385  
0.3323408118509327 0.8739328360121884 0.5000000182007699  
0.1260665365165851 0.4584087046588636 0.4999998065714232  
0.4382058183219246 0.7712531595928722 0.5000000188744663  
0.2287493535164615 0.6669524147479489 0.5000000077631839  
0.3330482841683375 0.5617975120322108 0.5000000350237747  
0.1256438558570971 0.3540857265609633 0.5000000124243023  
0.2284391716441046 0.8743575975347306 0.5000000004997659  
0.6459154826828647 0.7715593392698895 0.5000001314321545  
0.3286222370865292 0.4570778475652225 0.5000000026479035  
0.1284539113022087 0.6713768332323604 0.5000000219957687  
0.5429247618273207 0.8715476188544656 0.5000001320652155  
0.2284092858951620 0.5617597866305227 0.5000000217941598

|                    |                    |                    |
|--------------------|--------------------|--------------------|
| 0.3333517792294121 | 0.7715924712689659 | 0.5000000012817989 |
| 0.4382416053376508 | 0.6666503152870999 | 0.5000000139614947 |
| 0.7559598241751715 | 0.9869583411303406 | 0.5000001114204323 |
| 0.0130396022734018 | 0.7689947357549271 | 0.4999999967355750 |
| 0.2309979834625323 | 0.2440441792737042 | 0.4999999959513036 |
| 0.0285967773353957 | 0.2590346442064615 | 0.4999999868314922 |
| 0.2304384731217942 | 0.9714051343316346 | 0.4999999919655246 |
| 0.7409658844791553 | 0.7695629942496325 | 0.5000000025354369 |
| 0.8438339855378422 | 0.0754713207013807 | 0.5000000054581909 |
| 0.9245264862469414 | 0.7683595425950697 | 0.4999999912641150 |
| 0.2316357237682182 | 0.1561637985428802 | 0.4999999917126551 |
| 0.9404136953421516 | 0.1719599172981876 | 0.4999999816209704 |
| 0.2315453194162615 | 0.0595858538493372 | 0.4999999883238785 |
| 0.8280400817361151 | 0.7684557694810921 | 0.4999999851556934 |

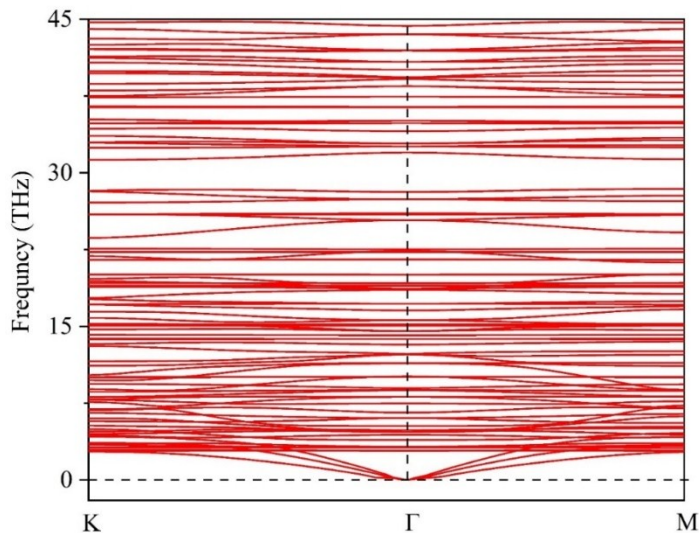

**Figure S1** Phonon spectra calculated with  $2 \times 2 \times 1$  supercell.

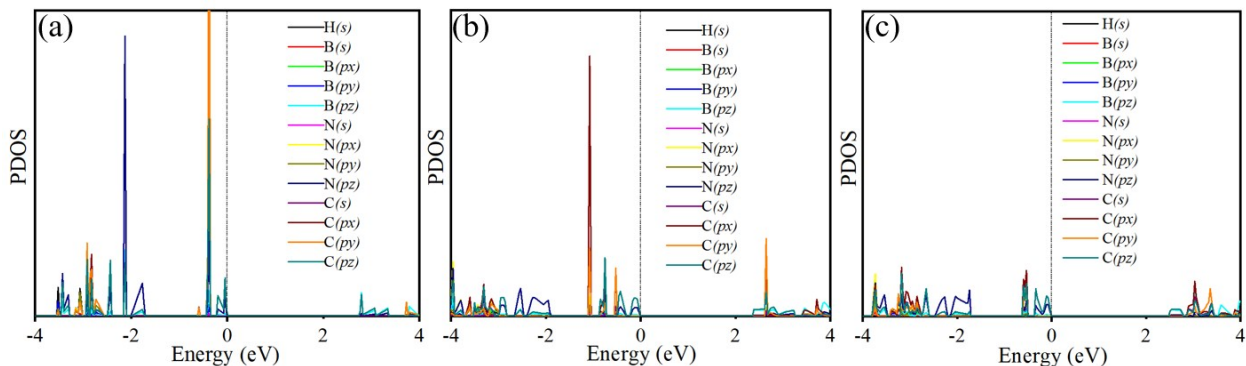

**2. PBE results for the PDOS of TpG and its BN-analogous structure.**

**Figure S2** Partial density of states of Tp-BNyne under (a) 0% (b) 10% Zigzag, and (c) Armchair, uniaxial

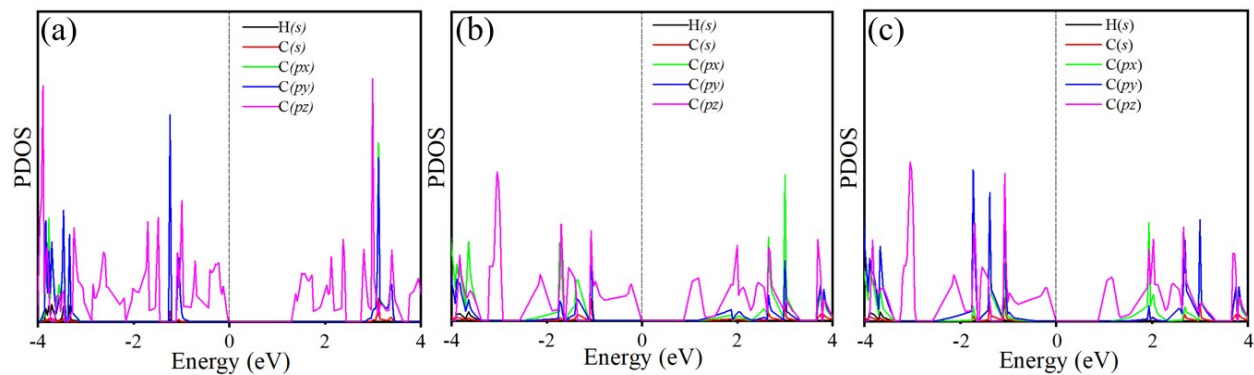

**Figure S3** Partial density of states of TpG under (a) 0% (b) 10% Zigzag, and (c) Armchair, uniaxial strain.

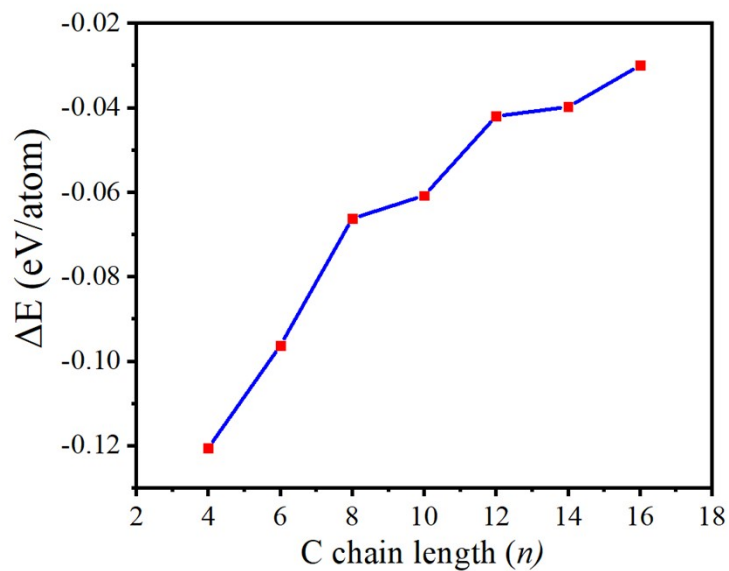

**Figure S4** Energetic stability changing with the length of C-chain length  $n$  in Tp-BNyne.
